# Supplementary material
Source: Springer Nature journal article supplement (https://www.springermedizin.de/resource/supplementary/12874_2012_916_MOESM3_ESM.pdf/9433186)

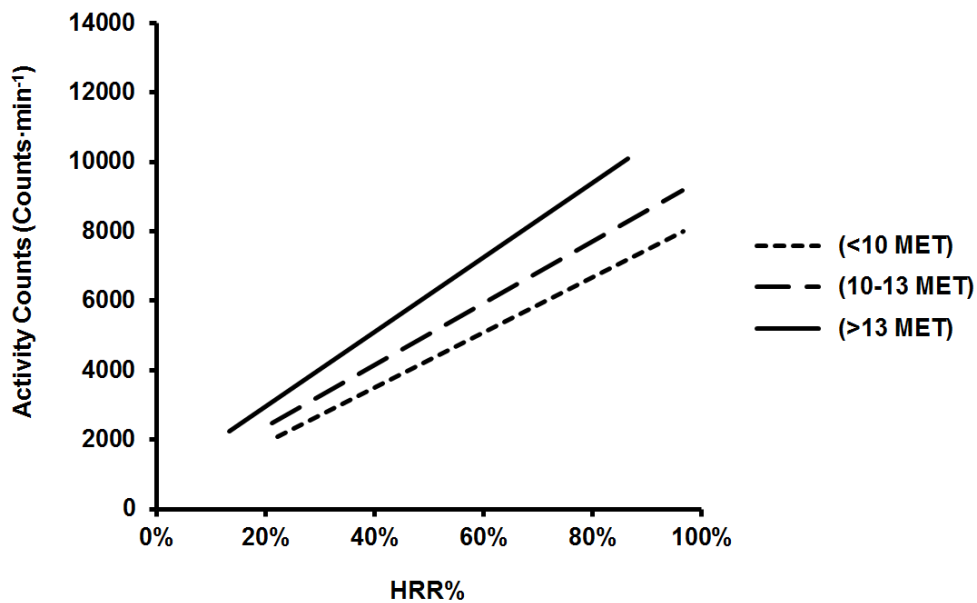

Figure 5

Supplement: MOESM3 [file 9433186]
